# Supplementary material
Source: PubMed Central journal article supplement (PMC5045719)
Supplement: NIHMS69359-supplement-Supplementary_tables.pdf [file NIHMS69359-supplement-Supplementary_tables.pdf]

**DSBCapture: *in situ* capture and direct sequencing of dsDNA breaks**

Stefanie V. Lensing<sup>1</sup>, Giovanni Marsico<sup>1</sup>, Robert Hänsel-Hertsch<sup>1</sup>, Enid Y. Lam<sup>1</sup>, David Tannahill<sup>1</sup> & Shankar Balasubramanian<sup>1,2,3</sup>

1. Cancer Research UK Cambridge Institute, University of Cambridge, Cambridge, UK.
  2. Department of Chemistry, University of Cambridge, Cambridge, UK.
  3. School of Clinical Medicine, University of Cambridge, Cambridge, UK.
  4. Present address: Cancer Research Division, Peter MacCallum Cancer Centre, East Melbourne, Victoria, Australia.
- Correspondence should be addressed to S.B.: sb10031@cam.ac.uk

**Supplementary Table 1.** EcoRV (HeLa) DSBCapture sequencing data. Alignment statistics for a paired-end MiSeq sequencing run of the EcoRV DSBCapture library.

| EcoRV (HeLa) DSBCapture experiment                    | Number     |
|-------------------------------------------------------|------------|
| Reads sequenced                                       | 43,794,614 |
| Clean reads aligned                                   | 31,267,705 |
| Clean reads from read 1                               | 16,366,684 |
| Unduplicated clean reads from read 1                  | 13,449,911 |
| Unduplicated clean reads from read 1 (forward strand) | 6,718,566  |
| Unduplicated clean reads from read 1 (reverse strand) | 6,731,345  |

**Supplementary Table 2.** AID-DIVa U2OS DSBCapture sequencing data. Alignment statistics for a paired-end NextSeq sequencing run of the AID-DIVa U2OS DSBCapture library. The % of proximal reads used was calculated as the number of unduplicated proximal reads divided by the total number of proximal reads sequenced (total number of proximal reads = # Reads/2).

| Library          | # Reads     | # Clean Aligned Reads | # Unduplicated Reads | % Duplication | # Unduplicated Proximal Reads | % Proximal Reads Used |
|------------------|-------------|-----------------------|----------------------|---------------|-------------------------------|-----------------------|
| U2OS DSB-Capture | 267,536,292 | 230,074,135           | 83,734,433           | 63.6          | 37,347,231                    | 27.9                  |

**Supplementary Table 3.** NHEK DSBCapture and BLESS sequencing data. Combined data from multiple paired-end NextSeq sequencing runs of the NHEK BLESS and DSBCapture libraries, where two independent biological replicates were performed (N1 and N2). The % of proximal reads used was calculated as the number of unduplicated proximal reads divided by the total number of proximal reads sequenced (total number of proximal reads = # Reads/2).

| Library        | # Reads     | # Clean Aligned Reads | % Clean Reads | # Unduplicated Reads | % Duplication | # Unduplicated Proximal Reads | % Proximal Reads Used |
|----------------|-------------|-----------------------|---------------|----------------------|---------------|-------------------------------|-----------------------|
| DSB-Capture N1 | 353,056,932 | 314,223,106           | 89.0          | 256,152,484          | 18.5          | 124,192,457                   | 70.4                  |
| DSB-Capture N2 | 229,658,364 | 204,047,616           | 88.8          | 160,803,701          | 21.2          | 77,523,430                    | 67.5                  |
| BLESS N1       | 324,872,812 | 228,953,681           | 70.5          | 147,477,098          | 35.6          | 71,305,629                    | 43.9                  |
| BLESS N2       | 585,674,924 | 317,449,269           | 54.2          | 51,725,762           | 83.7          | 24,766,932                    | 8.5                   |

**Supplementary Table 4.** Overlap of high confidence DSBCapture peaks in NHEKs with various marks.

| Mark     | # DSBs overlapping mark | Fold enrichment of DSB overlapping mark/random | % DSBs overlapping mark |
|----------|-------------------------|------------------------------------------------|-------------------------|
| DNase    | 64,763                  | 33.3                                           | 76.2                    |
| H3K4me1  | 58,844                  | 10.7                                           | 69.3                    |
| H3K4me2  | 58,842                  | 14.5                                           | 69.3                    |
| H2AZ     | 48,959                  | 11.4                                           | 57.6                    |
| H3K27ac  | 45,991                  | 15.2                                           | 54.1                    |
| POL2B    | 32,172                  | 12.2                                           | 37.9                    |
| CTCF     | 25,347                  | 25.0                                           | 29.8                    |
| H3K4me3  | 20,171                  | 17.4                                           | 23.7                    |
| H3K79me2 | 18,242                  | 3.3                                            | 21.5                    |
| P63      | 6,131                   | 39.1                                           | 7.2                     |
| EZH2     | 4,884                   | 3.2                                            | 5.7                     |
| H3K27me3 | 3,766                   | 1.2                                            | 4.4                     |
| H3K36me3 | 3,044                   | 0.8                                            | 3.6                     |
| H3K9me3  | 1,908                   | 0.7                                            | 2.2                     |
